# Supplementary material for: Impact of Preoperative Low Prognostic Nutritional Index and High Intramuscular Adipose Tissue Content on Outcomes of Patients with Oral Squamous Cell Carcinoma
Source: PubMed Central journal article supplement (PMC7692578; doi:10.3390/cancers12113167), 2020-10-28
Supplement: cancers-12-03167-s001.pdf [file cancers-12-03167-s001.pdf]

Supplementary Materials

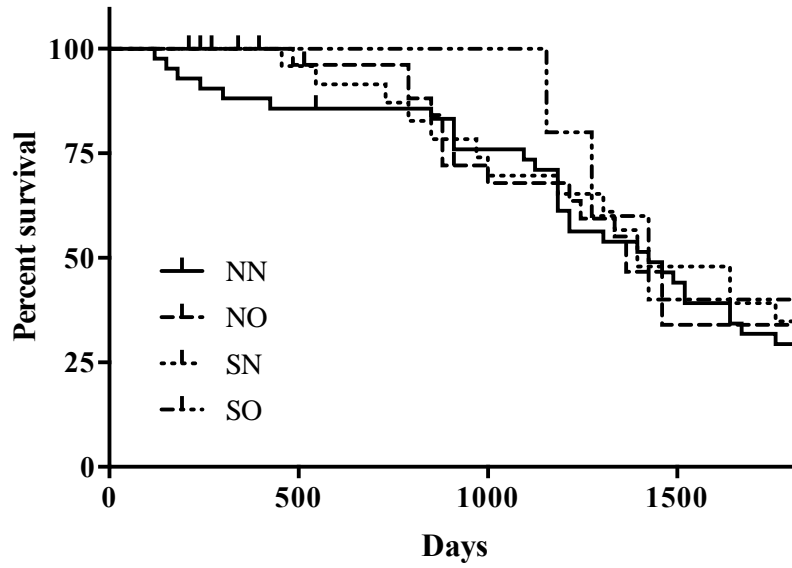

**Figure S1.** Disease-specific survival rates in patients with OSCC according to PMI and obesity. NN, nonsarcopenic/nonobesity; NO, nonsarcopenic/obesity; SN, sarcopenic/nonobesity; SO, sarcopenic/obesity.

**Table S1.** Clinical characteristics classified by PMI and BMI.

|                          | NN<br>(n=42)     | NO<br>(n=32)     | SN<br>(n=24)     | SO<br>(n=5)      |
|--------------------------|------------------|------------------|------------------|------------------|
| Sex (male/female)        | 29/13            | 12/20            | 18/6             | 2/3              |
| Age (years)              | 63.5 [56–74]     | 75 [63.5–81.5]   | 69 [60–76]       | 67 [62–78]       |
| BMI (kg/m <sup>2</sup> ) | 22.1 [20.1–23.5] | 21.4 [19.7–23.0] | 26.9 [25.5–29.1] | 26.8 [26.5–27.5] |
| PNI                      | 50.5 [46.9–53.4] | 49.8 [46.7–52.1] | 55.3 [51.3–58.9] | 50.1 [49.0–53.9] |

Continuous data are presented as the medians (interquartile range [IQR]). BMI, body mass index; PNI, prognostic nutritional index; NN, nonsarcopenic/nonobesity; NO, nonsarcopenic/obesity; SN, sarcopenic/nonobesity; SO, sarcopenic/obesity.

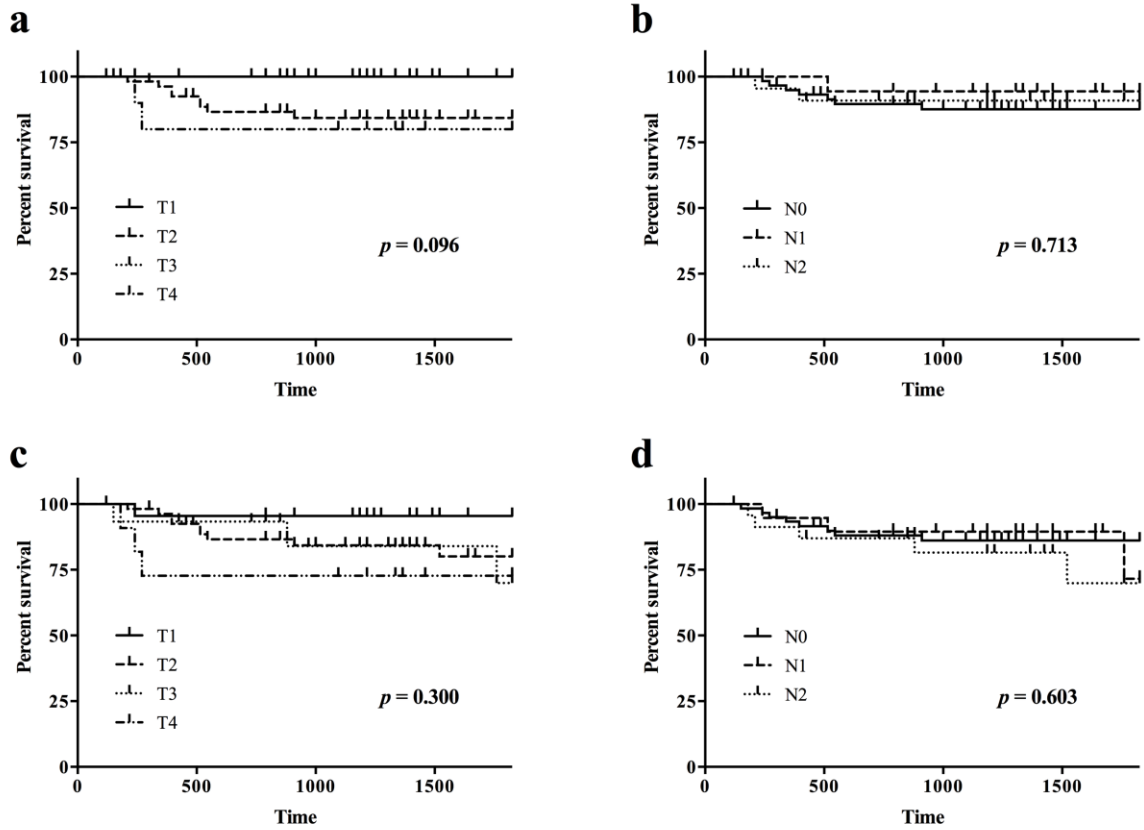

**Figure S2.** Survival rates in patients with OSCC according to T and N classification. There were no statistically significant differences between the groups in DSS (**a**,  $p=0.096$ ; **b**,  $p=0.713$ ) or OS (**c**,  $p=0.300$ ; **d**,  $p=0.603$ ). DSS, disease-specific survival; OS, overall survival.
